# Supplementary material for: Cell morphological analysis of SARS-CoV-2 infection by transmission electron microscopy
Source: PubMed Central journal article supplement — J Thorac Dis. 2020 Aug;12(8):4368–73. doi: 10.21037/jtd-20-1368 (PMC7475591; doi:10.21037/jtd-20-1368), 2020-08
Supplement: jtd-12-08-4368-dss.pdf [file jtd-12-08-4368-dss.pdf]

| Data Sharing Statement |                                                                                                                                                    |                                                                                                                                                                                                                   |
|------------------------|----------------------------------------------------------------------------------------------------------------------------------------------------|-------------------------------------------------------------------------------------------------------------------------------------------------------------------------------------------------------------------|
| Article Info           | n/a (editor will fill in this)                                                                                                                     |                                                                                                                                                                                                                   |
| Item                   | Question                                                                                                                                           | Authors' Response<br>(place "-" if not applicable)                                                                                                                                                                |
| 1                      | Would you like to share data collected for your study to others?                                                                                   | Yes                                                                                                                                                                                                               |
| 2                      | If not, would you like to share the reason for your decision?                                                                                      | -                                                                                                                                                                                                                 |
| 3                      | What data in particular will be shared?                                                                                                            | The ultrastructural figures of SARS-CoV-2 from BALF of the COVID-19 patients and morphological comparison of HCoV-229E with SARS-CoV-2 by TEM will be shared, which has seldom been provided in previous studies. |
| 4                      | Any other documents will be share? Such as study protocol, statistical analysis plan, informed consent form, clinical study report, analytic code. | Study protocol, informed consent form, and clinical study report will also be shared if requested.                                                                                                                |
| 5                      | When will data availability begin?                                                                                                                 | From the publication date.                                                                                                                                                                                        |
| 6                      | When will data availability end?                                                                                                                   | Two years within the publication date, since the technique or survival date may be updated over time.                                                                                                             |
| 7                      | To whom will you share the data?                                                                                                                   | Medical researcher and virologists who are interested in studies of SARS-Cov-2.                                                                                                                                   |
| 8                      | For what type of analysis or purpose?                                                                                                              | For analysis to The ultrastructural characteristics of SARS-CoV-2 from BALF of the COVID-19 patients                                                                                                              |
| 9                      | How or where can the data/documents be obtained?                                                                                                   | Emails could be sent to the address below to obtain the shared data:<br>jeffyah@163.com                                                                                                                           |
| 10                     | Any other restrictions?                                                                                                                            | We may balance the potential benefits and risks for each request and then provide the data that could be shared.                                                                                                  |
